# Supplementary material for: Pathogenic UNC13A variants cause a neurodevelopmental syndrome by impairing synaptic function
Source: Springer Nature journal article supplement (doi:10.1038/s41588-025-02361-5), 2025-10-22
Supplement: MOESM1 [file 41588_2025_2361_MOESM1_ESM.pdf › 41588_2025_2361_MOESM1_ESM.pdf]

# Pathogenic *UNC13A* variants cause a neurodevelopmental syndrome by impairing synaptic function

In the format provided by the  
authors and unedited

## Table of contents

1. Supplementary Table 1: Plasmid and primer sequence information
2. Supplementary Table 2: Antibody information
3. Supplementary Note 1: Sequence information for *C. elegans* strains
4. Supplementary Note 2: Additional funding acknowledgements

**Supplementary Table 1: Plasmid and primer sequence information**

| Plasmid and primer sequence used to generate the mutation                                        | Domain       | Corresponding variation in the Human UNC13A | Figure                    |
|--------------------------------------------------------------------------------------------------|--------------|---------------------------------------------|---------------------------|
| f(syn)wrbn- <i>Unc13a</i> <sup>WT</sup> -GFP                                                     | -            | -                                           | Figs. 2-6, ExD Figs. 4, 8 |
| f(syn)wrbn- <i>Unc13a</i> <sup>E52K</sup> -GFP<br>5'-GCTGGGAGCAGGACTTCATGTTTAAGATCAACCGCC -3'    | C2A          | E52K                                        | Fig. 2                    |
| f(syn)wrbn- <i>Unc13a</i> <sup>R201H</sup> -GFP<br>5'-CAGTGATTATCATAGTGAGACGA -3'                | IDR          | R202H                                       | Figs. 2, 3, 6, ExD Fig. 8 |
| f(syn)wrbn- <i>Unc13a</i> <sup>C600F</sup> -GFP<br>5'-GCATGCGCTGCACCGAGTTCGGCGTTAAG -3'          | C1           | C587F                                       | Figs. 2, 5, 6             |
| f(syn)wrbn- <i>Unc13a</i> <sup>R812Q</sup> -GFP<br>5'-GTCGGGCGCCATTCAGCTTCACATCAGTG -3'          | C2B          | R799Q                                       | Fig. 2, ExD Fig. 4        |
| f(syn)wrbn- <i>Unc13a</i> <sup>G821D</sup> -GFP<br>5'-CAGTGTGGAGATCAAAGACGAGGAGAAGGTGGCACC -3'   | UNC13A hinge | G808D                                       | Figs. 2, 4, 6             |
| f(syn)wrbn- <i>Unc13a</i> <sup>N1026S</sup> -GFP<br>5'-CCTACGAGTACATCTTCAGCAACTGTCATGAGCTCTA -3' | MUN          | N1013S                                      | Fig. 2, ExD Fig. 4        |
| f(syn)-NLS.GFP-P2A- <i>Unc13a</i> <sup>WT</sup> -Flag                                            | -            | -                                           | Fig. 3 g-m                |
| pEGFP-N1-NLS.GFP-P2A- <i>Unc13a</i> <sup>WT</sup> -Flag                                          |              |                                             | ExD Fig. 5                |
| pEGFP-N1-NLS.GFP-P2A- <i>Unc13a</i> <sup>T22M</sup> -Flag<br>5'-AAGTTCAACATGTACGTGACG-3'         | C2A          | T22M                                        | ExD Fig. 5                |
| f(syn)-NLS.GFP-P2A- <i>Unc13a</i> <sup>E52K</sup> -Flag                                          | C2A          | E52K                                        | Fig. 3 g-m                |
| pEGFP-N1-NLS.GFP-P2A- <i>Unc13a</i> <sup>E52K</sup> -Flag                                        | C2A          | E52K                                        | ExD Fig. 5                |
| pEGFP-N1-NLS.GFP-P2A- <i>Unc13a</i> <sup>G183S</sup> -Flag<br>5'-CTTTGGCTGGAGTGAACAGAATG -3'     | IDR          | G183S                                       | ExD Fig. 5                |
| pEGFP-N1-NLS.GFP-P2A- <i>Unc13a</i> <sup>R201H</sup> -Flag                                       | IDR          | R202H                                       | ExD Fig. 5                |
| pEGFP-N1-NLS.GFP-P2A- <i>Unc13a</i> <sup>E246K</sup> -Flag<br>5'-CATGCACAGCTATAAAGAGTTCTCTGAG-3' | IDR          | E247K                                       | ExD Fig. 5                |
| pEGFP-N1-NLS.GFP-P2A- <i>Unc13a</i> <sup>C600F</sup> -Flag                                       | IDR          | C587F                                       | ExD Fig. 5                |

### Supplementary Table 2: Antibody information

The following antibodies were used in this study:

Primary and secondary antibodies for immunostaining (Fig.2)

| Antibody                       | Source            | Dilution | RRID       | Identifier |
|--------------------------------|-------------------|----------|------------|------------|
| Mouse monoclonal GFP           | Merck Millipore   | 1:250    | AB_94936   | MAB3580    |
| Rabbit polyclonal VGLUT1       | Synaptic Systems  | 1:1000   | AB_887877  | 135 302    |
| Guinea pig polyclonal Shank2   | Synaptic Systems  | 1:250    | AB_2619861 | 162 204    |
| Chicken polyclonal MAP2        | Novus Biologicals | 1:1000   | AB_2138178 | NB300-213  |
| Goat anti-Mouse Alexa 488      | Thermo Fisher     | 1:2000   | AB_2534088 | A11029     |
| Goat anti-Rabbit Alexa 633     | Thermo Fisher     | 1:2000   | AB_141419  | A21071     |
| Goat anti-Guinea Pig Alexa 568 | Abcam             | 1:2000   | AB_2864763 | Ab175714   |
| Goat anti-Chicken Alexa 405    | Abcam             | 1:1000   | AB_2890171 | Ab175674   |

Primary and secondary antibodies for Western Blot analysis (Extended Fig. 5):

| Antibody                                               | Source                 | Dilution | RRID       | Identifier    |
|--------------------------------------------------------|------------------------|----------|------------|---------------|
| Polyclonal rabbit anti-FLAG                            | Sigma-Aldrich          | 1:2000   | AB_439687  | F7425         |
| Monoclonal mouse anti- Green Fluorescent Protein (1E4) | Enzo Life Sciences     | 1:1000   |            | ADI-SAB-500-E |
| Peroxidase AffiniPure Goat Anti-Mouse IgG (H+L)        | Jackson immunoResearch | 1:5000   | AB_2307392 | 115-035-146   |
| Peroxidase AffiniPure Goat Anti-Rabbit IgG (H+L)       | Jackson immunoResearch | 1:30000  | AB_2307391 | 111-035-144   |

## Supplementary Note 1: Sequence information for *C. elegans* strains

Sequence information (Bold= mutation; Underline = RE)

| Strain  | <i>unc-13</i> allele | Description         | Human UNC13A | <i>C. elegans</i> UNC-13 |
|---------|----------------------|---------------------|--------------|--------------------------|
| JSD1433 | <i>nu641</i>         | C-terminal mScarlet | -            | -                        |
| JSD1381 | <i>tau45</i>         | Hinge proline       | P814L        | P956L                    |
| JSD1422 | <i>tau48 nu641</i>   | Hinge glycine       | G808C        | G950C                    |
| JSD1440 | <i>tau64 nu641</i>   | C1 domain cysteine  | C587F        | C729F                    |

### ***unc-13(tau45)***

crRNA: CATGTATACTGAACATGATA

AAATTGACTCGTGAATCTGATGATTTCTTGGGACAAACAGTAATTGAAGTTCGAACTTTA  
TCTGGTGAAATGGATGTCTGGTATAATCTTGAAAAGAGAACTGATAAATCTGCTGTATCC  
GGAGCAATTCGATTGCATATCAATGTTGAAATCAAGGGAGAAGAGAAGCTAGCATTGTA  
TCATGTTCAAGTATACATGTCTTCATGAACATCTTTTTGCTGCTCATTGTGTAGA

### ***unc-13(tau48 nu641)***

crRNA: GCATATCAATGTTGAAATCA

AAATCTGCTGTATCCGGAGCAATTCGATTGCATATCAATGTTGAAATCAAGT**GC**GAAGA  
GAAGCTTGCACCGTATCATGTTCAAGTATACATGTCTTCATGAACATCTTTTTGCTGCTCA  
T

### ***unc-13(tau64 nu641)***

Two crRNAs used:

crRNA 1: CGAAGGATTATTGTGGGGAT

crRNA 2: TCCATGTTTCGTCGACTTCT

TTCCAAACACCCACGTTTTGTTACGAATGCGAAGGATTATTGTGGGGATTaGCTAGACA  
AGGATTGCGATGTACTCAGT**t**TCAAGTGAAAGTTCACGATAAATGTCGTGAATTGCTCAG  
CGCTGATTGTCTgCAgAGAGCAGCtGAGAAGTCGACGAAACATGGAGAAGCTGATAGAA  
CACAGTCACTTGTC

### **Co-CRISPR, *unc-58 (L428F)***

crRNA: ATCCACGCACATGGTCACTA

ATAGCCGAGTTAGGAAACAAATTTTTCTTTCAGGTT**TTCT**CAGTAGTGACCATGTGCGTG  
GATCTTGCGTCCACACA

**Supplementary Note 2: Additional funding acknowledgements.** This work was supported by the German Research Foundation DFG TH1538/3-1 (S.T), TRR 295 – 424778381 (A.A.K), the Japan Agency for Medical Research and Development (AMED) under grant numbers JP24ek0109674, JP24ek0109760, JP24ek0109548, JP24ek0109617, JP24ek0109677 (N. Matsumoto). S.S received support from the Einstein Center for Neurosciences Berlin, funded by the Einstein Foundation Berlin (EZ-2014-226). F.B is a participant in the Clinician Scientist Program (CS4RARE) funded by the Alliance4Rare and associated with the BIH Charité Clinician Scientist Program. K.Õ and K.Reinson are supported by Estonian Research Council grants PRG471 and PRG2040. A.P was funded by Fondation Maladies Rares. Research at the Broad Institute of MIT and Harvard Center for Mendelian Genomics (Broad CMG) was funded by the National Human Genome Research Institute (NHGRI), the National Eye Institute, the National Heart, Lung and Blood Institute grant UM1HG008900 and NHGRI grants U01HG011755 and R01HG009141. The research conducted at the Murdoch Children's Research Institute was supported by the Victorian Government's Operational Infrastructure Support Program, and the National Health and Medical Research Council Targeted Call for Research (GNT1113531). The Chair in Genomic Medicine awarded to J.C is generously supported by The Royal Children's Hospital Foundation. We thank funding by the Indian Council of Medical Research (ICMR), India (INDO/FRC/452/(Y-83)/2016-17/IHD, to B.A), the Conselho Nacional de Desenvolvimento Científico e Tecnológico (CNPq, Brasília, DF, Brazil, 303730/2022-6, to D.R.B), the Medical Research Council (UK MR/J004758/1, G0802760, G1001253 and (ICGNMD) MR/S005021/1, to H.H, (ICGNMD) MR/S005021/1 to S.E, the Wellcome Trust (WT093205MA and WT104033/Z/14/Z), The British Embassy Gulf Strategy Fund and NIHR UCL/UCLH BRC (to H.H), and the Medical Research Agency - ABM (2023/ABM/02/00003-00, to R.Š). I.H was supported by The Hartwell Foundation, the National Institute for Neurological Disorders and Stroke (R01 NS127830-01A1, R01 NS131512-01, K02 NS112600), EuroEPINOMICS-Rare Epilepsy Syndrome (RES) Consortium, and the German Research Foundation (HE5415/3-1, HE5415/5-1, HE5415/6-1 and He5415/7-1). S.M.R was supported by the STXBP1 Foundation and through intramural funding of the University of Pennsylvania within the ART-GC program. F.P.B was supported by the Hertie Foundation (P1240016, DrPrg SoSe 24), the Helmut and Edda Laich Foundation (62083717) and the Philipps University Marburg (62033831). Research by the University of Washington Center for Mendelian Genomics (UW-CMG) was funded by NHGRI and NHLBI grants UM1 HG006493 and U24 HG008956 and by the Office of the Director, NIH under Award Number S10OD021553. J.N was supported by the German Research Council DFG NE 2118/2-1 and NE 2118/3-1. S.C is supported by the Fondation Erasme pour la recherche medical.
